# Supplementary material for: Preparation of layered carbon nitride/titanium-based metal skeleton materials and study on their electrorheological properties
Source: Royal Society of Chemistry journal article supplement (doi:10.1039/d4sm01247j), 2024-11-27
Supplement: d4sm01247j1.pdf [file d4sm01247j1.pdf]

## **Supporting Information**

# **Preparation of Layered Carbon Nitride/Titanium based Metal Skeleton Materials and Study on Their Electrorheological Properties**

Liangkun Chen, Xiang Ji, Haochun Yan, Liyue Wang, Yusheng Lin, Baoxiang

Wang\*, Chuncheng Hao\*

College of Materials Science and Engineering,

Qingdao University of Science and Technology, Qingdao 266042, PR China

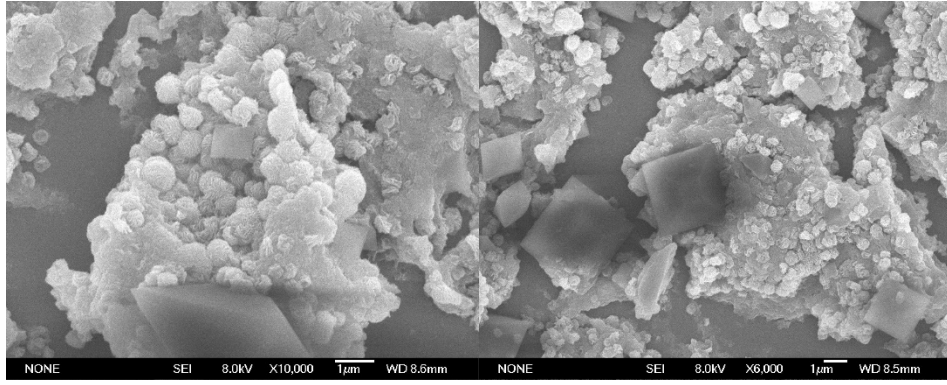

**Fig.S1** SEM image of MOF/g-C<sub>3</sub>N<sub>4</sub>-0.6.

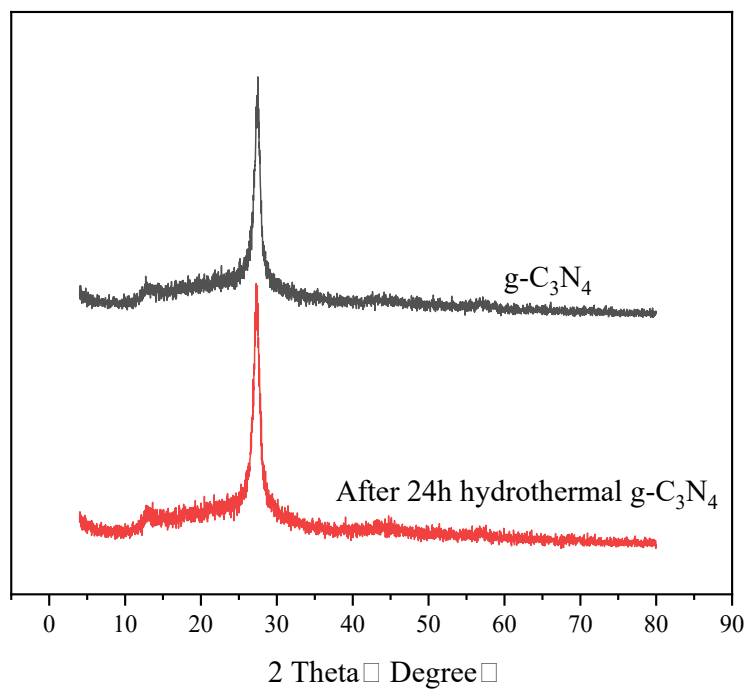

**Fig.S2** XRD patterns of g-C<sub>3</sub>N<sub>4</sub> before and after secondary hydrothermal treatment.

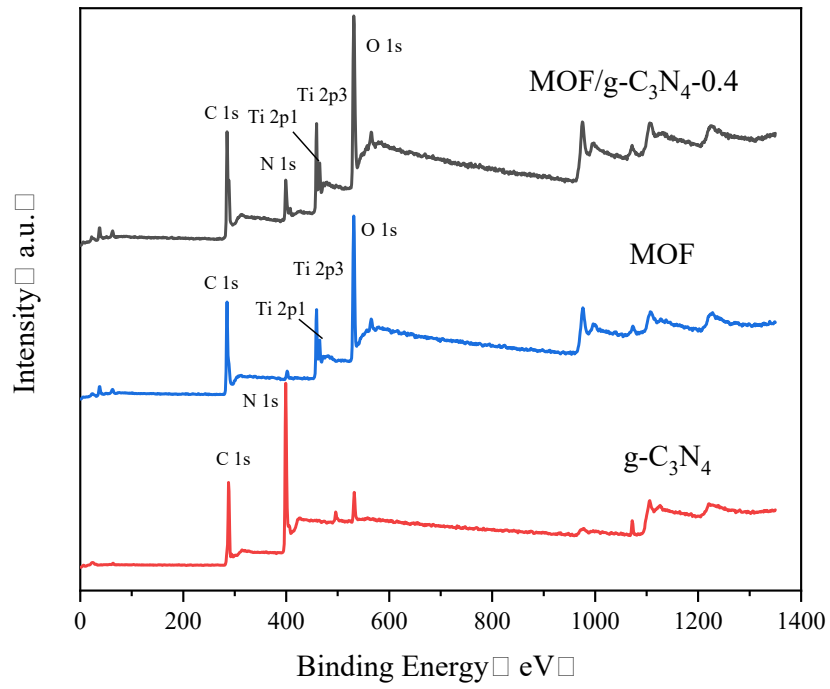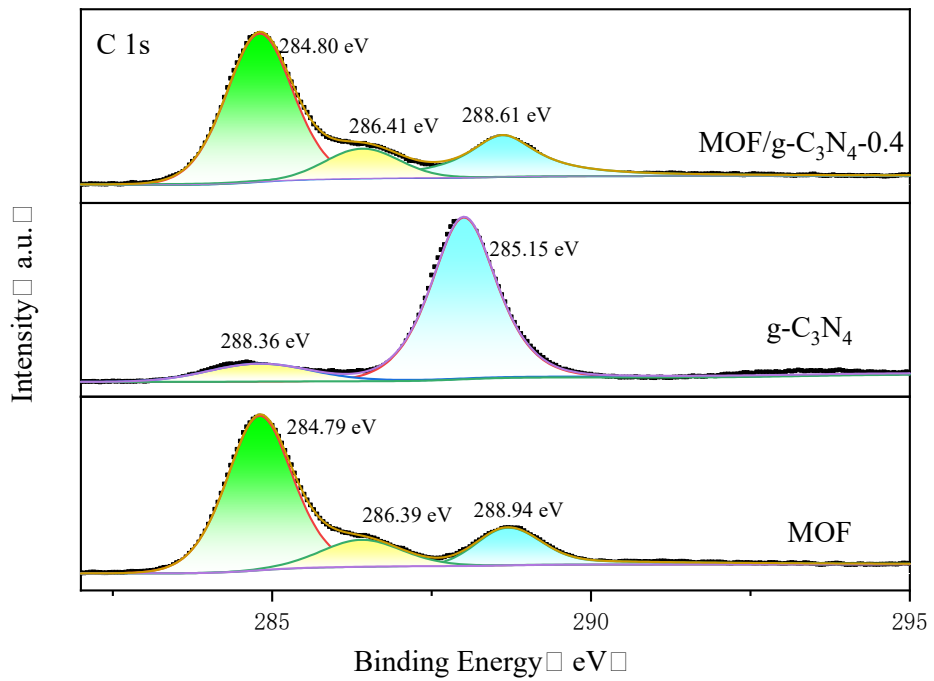

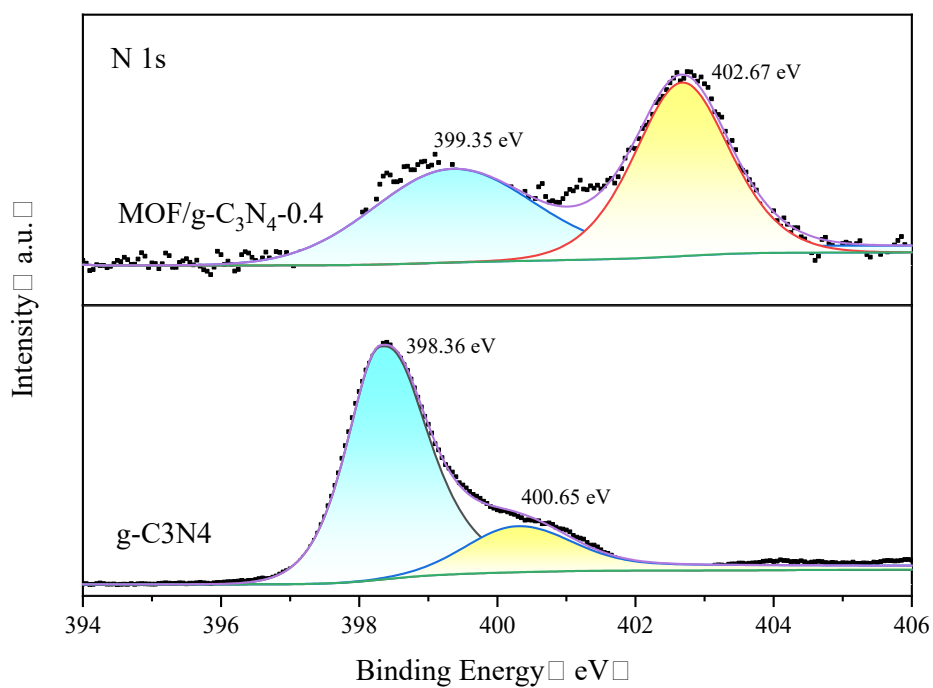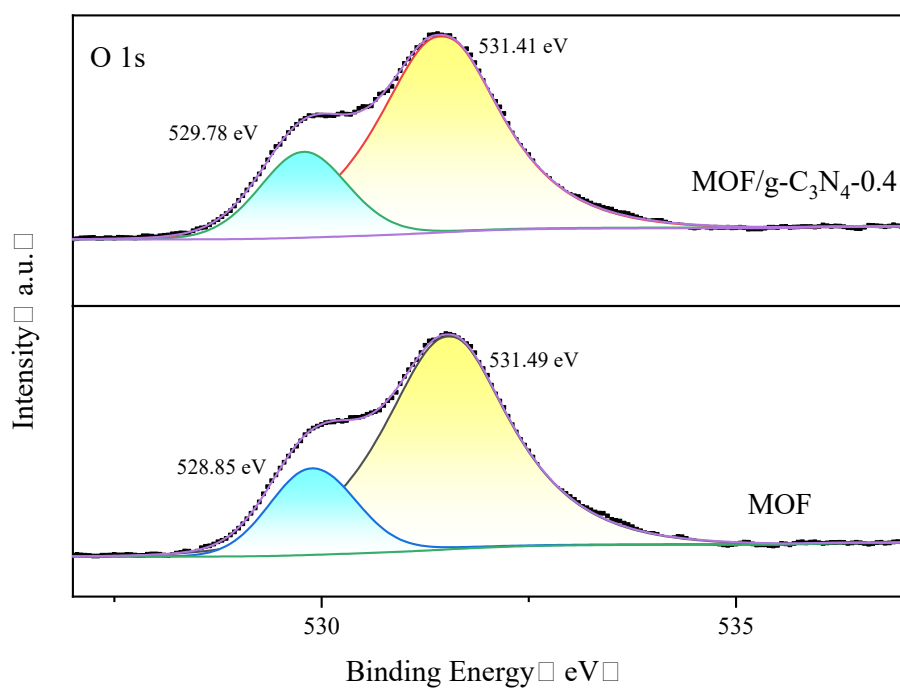

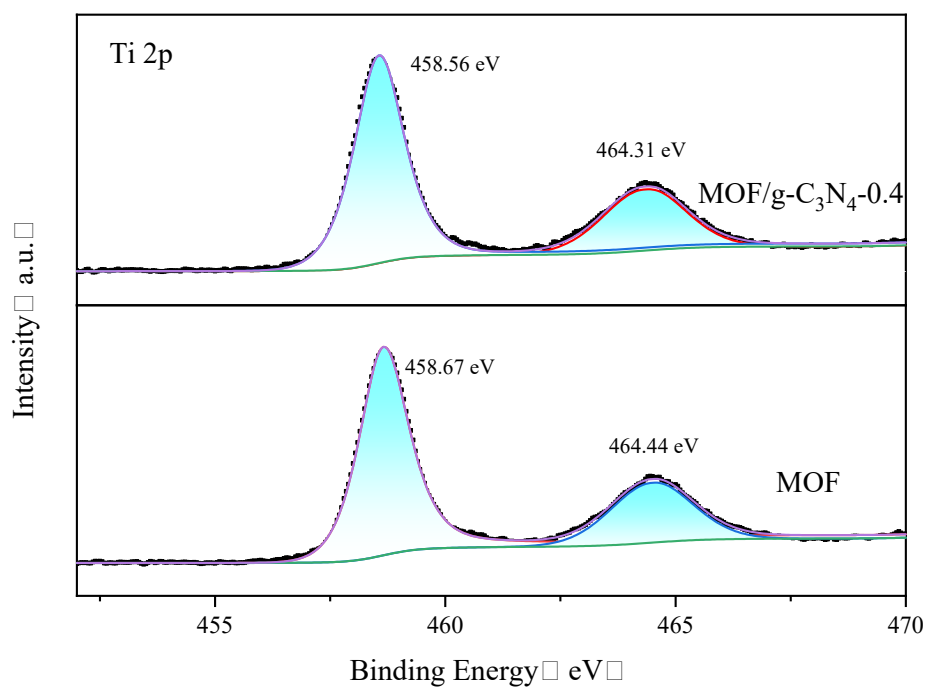

**Fig. S3** XPS spectra of g-C<sub>3</sub>N<sub>4</sub>, MOF/g-C<sub>3</sub>N<sub>4</sub>-0.4, and MOF nanoparticles: (a) the overall analysis of the sample, (b) C 1s , (c) N 1s, (d) O 1s and (e) Ti 2p respectively.

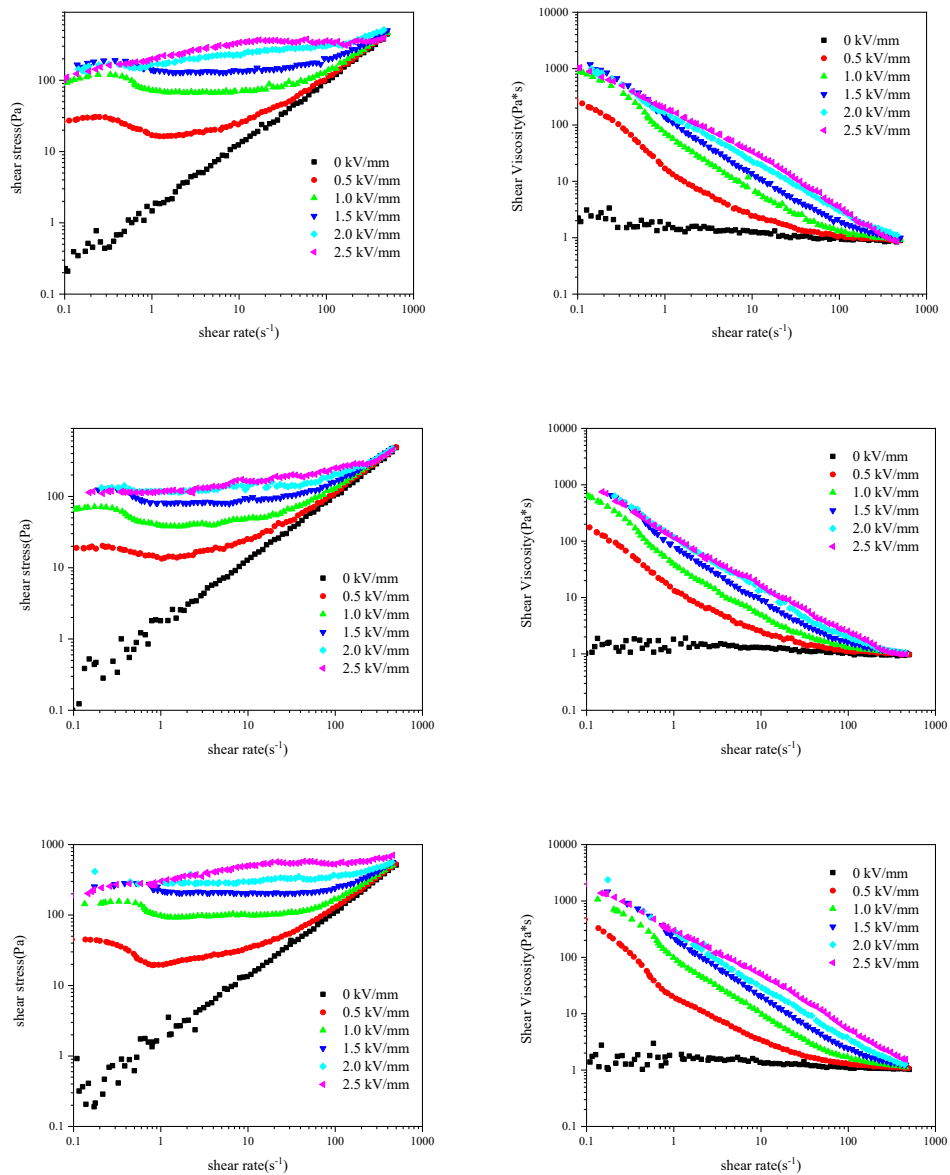

**Fig. S4** Shear stress curves and shear viscosity curves for MOF/g-C<sub>3</sub>N<sub>4</sub>-0.15(a, b), MOF/g-C<sub>3</sub>N<sub>4</sub>-0.2(c, d), MOF/g-C<sub>3</sub>N<sub>4</sub>-0.3(e, f)

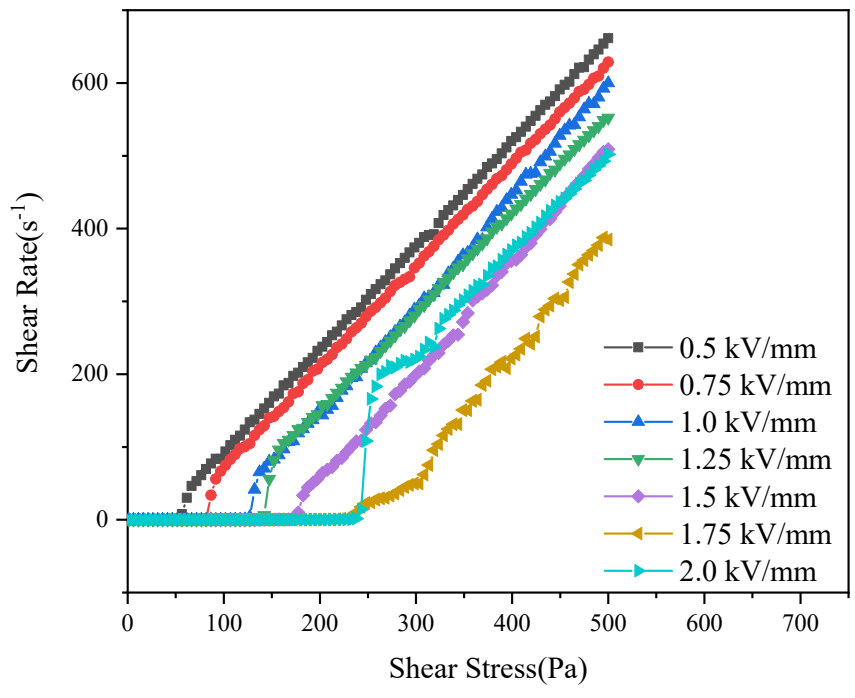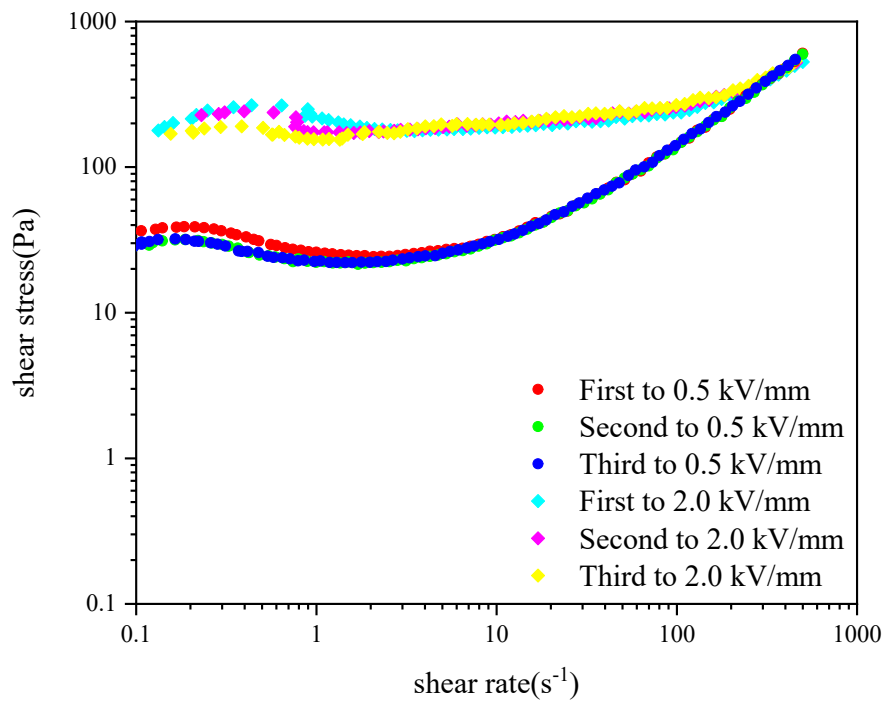



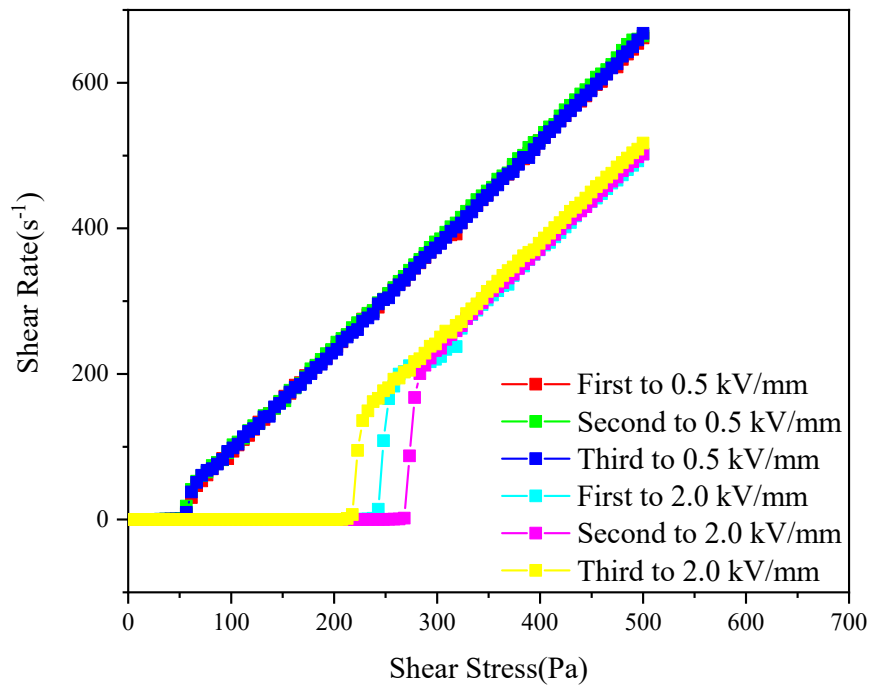

**Fig.S5** Curves of shear rate vs. shear stress for MOF/g-C<sub>3</sub>N<sub>4</sub>-0.4(a),three repeating experiments for CSR(b) and CSS(c) model.

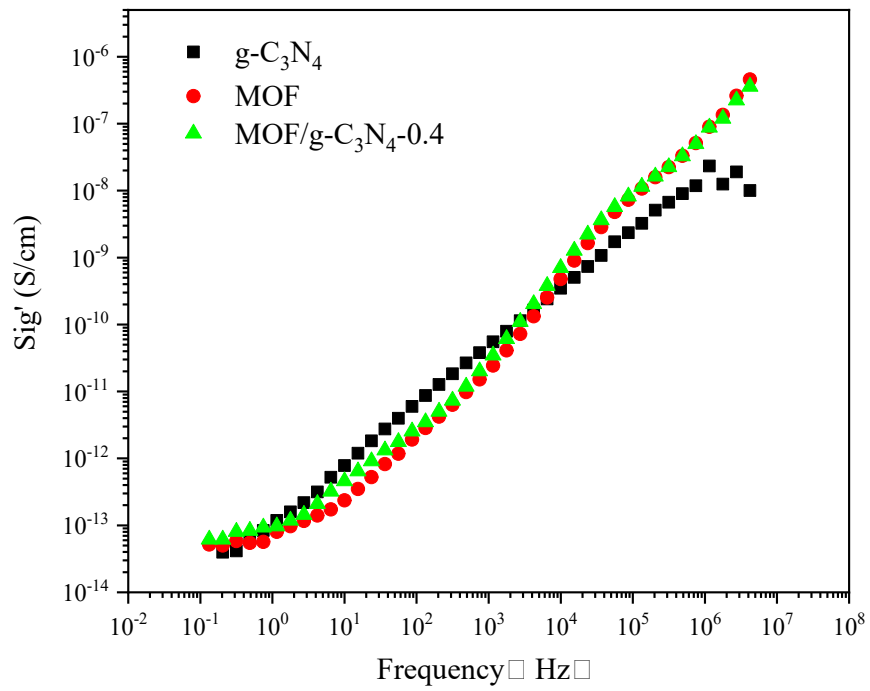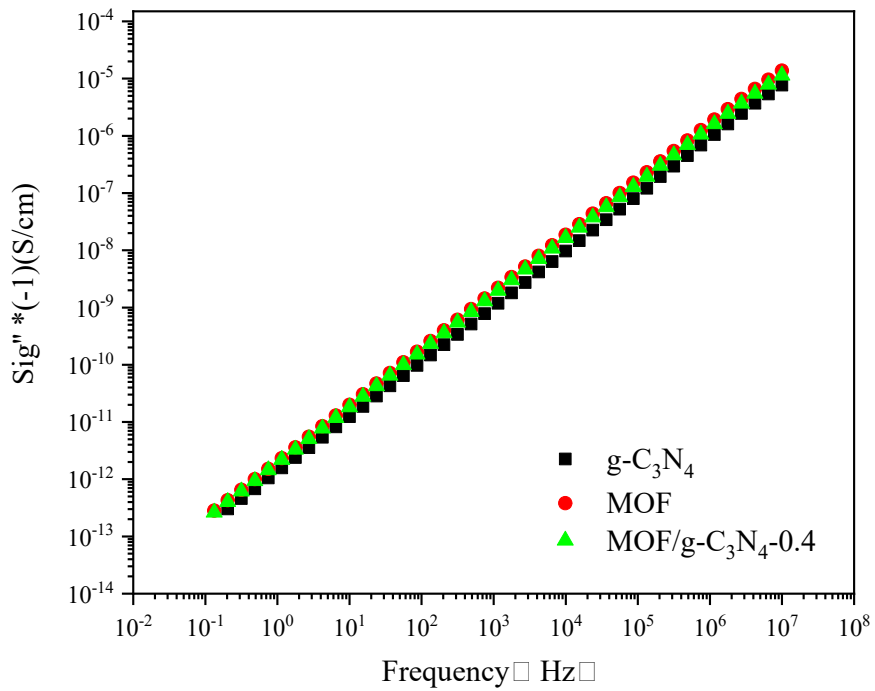

**Fig. S6** real(a) and imaginary(b) dielectric permittivity spectra for the MOF/ $g-C_3N_4$ -based

ER fluid.

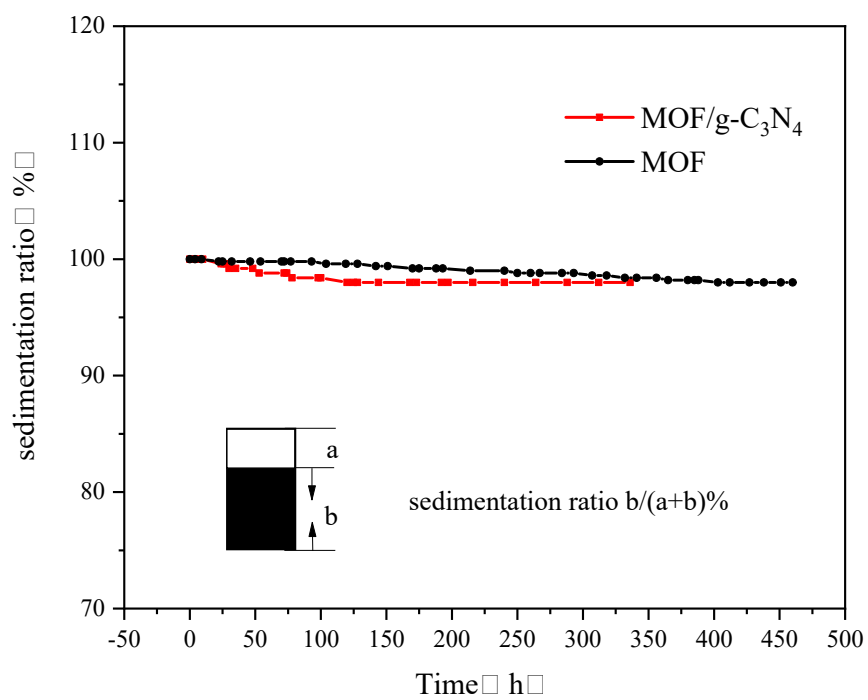

**Fig. S7** The sedimentation rate of the MOF and MOF/g-C<sub>3</sub>N<sub>4</sub> based electrorheological fluid.
